# Supplementary material for: Interaction of transactive response DNA binding protein 43 with nuclear factor κB in mild cognitive impairment with episodic memory deficits
Source: Acta Neuropathol Commun. 2014 Apr 1;2:37. doi: 10.1186/2051-5960-2-37 (PMC4230634; doi:10.1186/2051-5960-2-37)
Supplement: Additional file 2: Table S1 — Selected characteristics of subjects from the religious order study with a clinical diagnosis of Alzheimer’s disease. [file 2051-5960-2-37-S2.xls]

## Sheet: s table1 revise
Table S1	Selected characteristics of subjects from the religious order study with a clinical diagnosis of Alzheimer's disease
Characteristics				AD-p							AD-n
Subject No.				2		1	9	11	13	19	20	24	25	28	33	34
Sex (Male(M) or Female(F))				M		M	M	F	F	F	F	F	F	F	F	F
Age at death, y				80.4		89.8	83.7	74.8	83.6	88.7	84.5	95.9	92.5	91.3	85.4	82.8
Education, y				21		21	20	16	16	24	16	16	16	16	18	16
MMSE				20		12	17	3	25	19	25	7	0	25	25	16
Time since last MMSE, d				356		294	440	310	344	211	249	323	237	194	156	252
Global cognition score				-1.18		-2.35	-1.04	-3.1	-1.04	-1.19	-0.89	-2.39	-3.81	-1.13	-1.09	-1.79
Episodic memory				-2.22		-3.65	-0.57	-3.56	-0.88	-1.7	-1.45	-2.67	-4.06	-1.15	-1.31	-3.1
Semantic memory				-1.11		-1.42	-1.45	-3.39	-1.43	-0.67	-0.65	-2.88	-3.7	-0.98	0.17	-0.08
Working memory				-0.19		-1.12	-1.1	-2.34	-1.18	-0.5	-0.08	-1.67	-3.06	-0.36	-0.89	-0.94
Perceptual speed				-1.42		-1.99	-2.3	-3.33	-0.42	-1.61	-1.08	-2.41	-3.35	-2.65	-2.08	-2.38
Visuospatial ability				0.77		-1.17	-0.44	-2.11	-1.35	-1.17	-1.06	-1.64	-2.98	-1.66	-2.11	-1.51
apoE e4 allele carriage				+		-	+	+	+	-	+	-	-	-	-	++
Cerebellar pH				6.75		6.85	6.11	6.43	6.62	6.7	6.5	6.89	6.8	6.54	5.98	5.74
Postmortem delay, h				2.7		13.3	3	5.1	6	11.5	6.1	12.5	4.3	5	3.6	2.2
Neuritic plaque counts				30		93	7	51	31	11	7	34	13	0	0	34
Diffuse plaque counts				28		2	7	11	19	39	35	13	8	2	22	59
Aβ40 concentration (soluble)				1287.6		65.9	162.7	123.3	1987.9	299.4	89.2	175.5	526.2	157.4	234.8	661.1
Aβ40 concentration (insoluble)				518.6		37.2	23.3	317.7	35.6	22.6	11.9	56.5	112.6	292.1	162.4	8074.5
Aβ42 concentration (soluble)				8.64		2.2	0.7	6.8	4.2	8.9	5.6	4.8	7.5	0.8	3.1	2.5
Aβ42 concentration (insoluble)				3397.5		3359.9	347.8	4078.6	391.6	5294	2282.5	2205.8	3791.7	267.2	1799.7	3062.6
Neurofibrillary tangle counts				7		18	0	53	6	3	0	5	0	0	0	11
Total tau content (soluble)				1.4		1.1	0.8	0.7	1	0.7	0.7	0.9	1	0.9	0.9	0.9
Total tau content (insoluble)				2		2.7	0.6	3.3	1.7	0.8	0.5	1.4	0.9	0.9	0.8	2.1
Total phospho-tau content (soluble)				0		0.8	0.1		1.1	0.1	0.1	0.7	0.2	0.1	0.1	0.2
Total phospho-tau content (insoluble)				1.5		6	0.4	8.2	1.9	0.4	0	1.5	0.5	0.3	0.3	4.2
CERAD score				1		1	1	1	1	1	2	1	2	3	2	1
Braak score				V		V	III	V	V	IV	III	V	III	III	III	V
Reagan score				1		1	2	1	1	2	2	1	2	3	2	1
Hippocampal atrophy score				6		2	3	4	2	0	2	2	3	4	2	2
Full length (43kda) of TDP-43 content (TBS-soluble)				0.4		0.1	0.1	0.1	0.7	0.8	0.1	0.1	0.4	0.5	0.1	0.6
Total p65 content (TBS-soluble)				0.4		0.1	0.2	0.3	0.6	0.2	0.3	0.4	0.1	0.3	0.8	0.6
Presence of phospho-p65 content (TBS-soluble)				-		-	-	-	-	-	-	-	-	+	-	-
Aβ, beta-amyloid; AD, Alzheimer's disease; AD-n, AD without interaction of TDP-43 and p65; AD-p, AD with interaction of TDP-43 and p65; CERAD, Consortium to Establish a Registry for AD; K-W test, Kruskal-Wallis test; MMSE, Mini Mental State Examination; TDP-43, Transactive response DNA binding protein 43.
